# Supplementary material
Source: Springer Nature journal article supplement (https://www.springermedizin.de/resource/supplementary/12936_2010_1297_MOESM5_ESM.pdf/9549434)

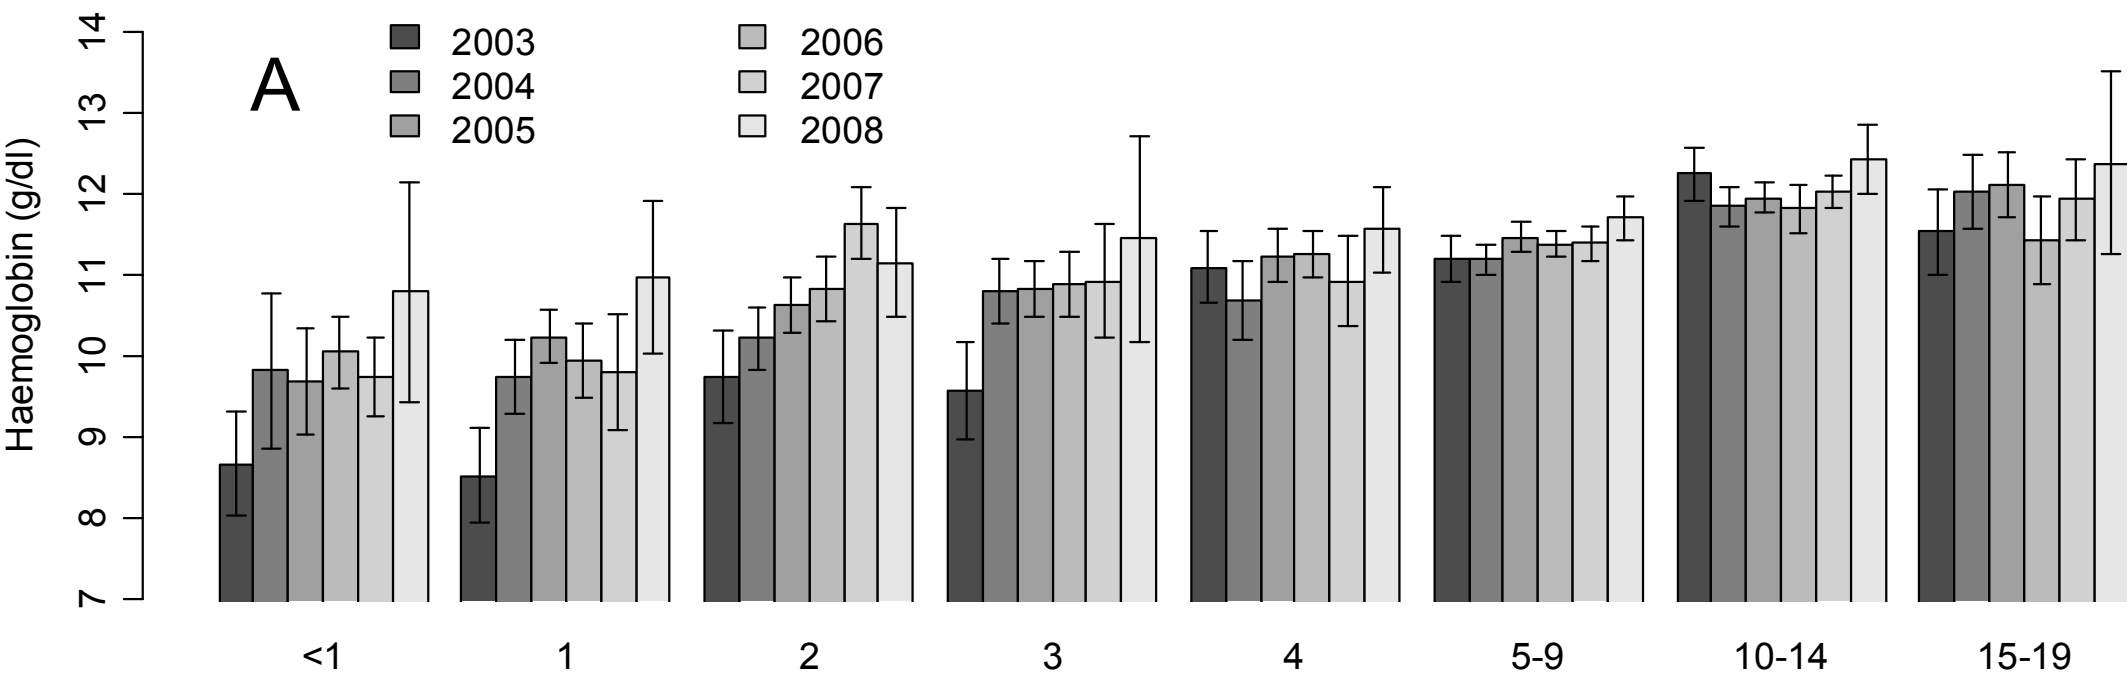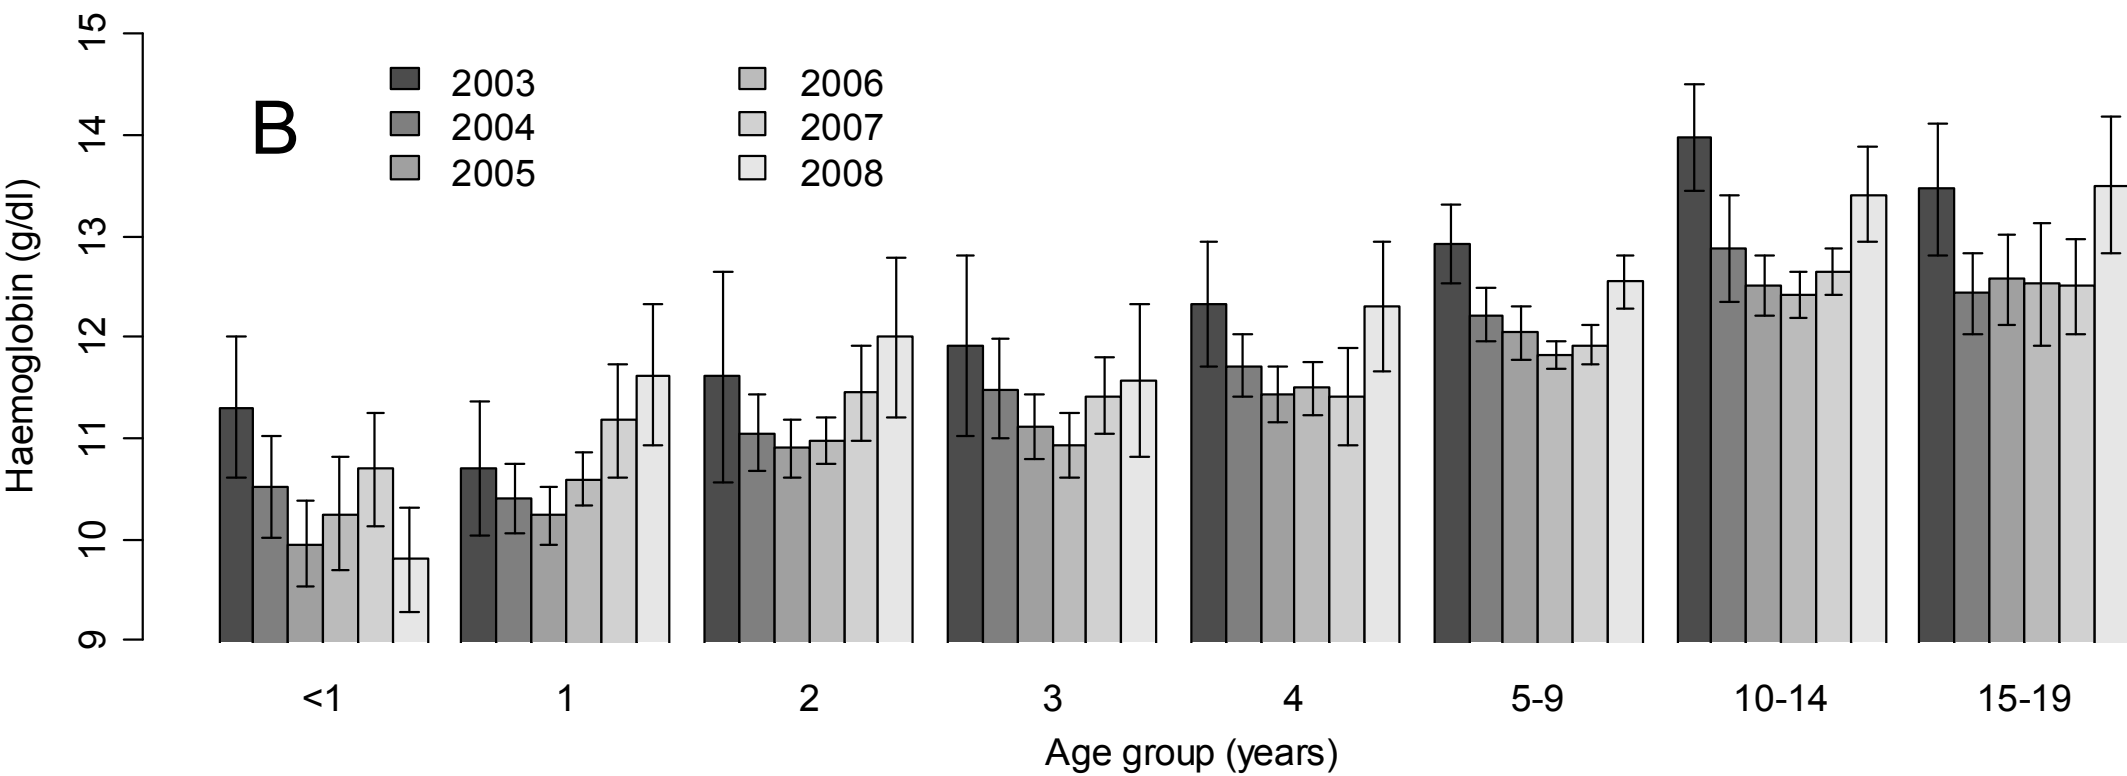

Supplement: MOESM5 [file 9549434]
